# Supplementary material for: miR-520d-5p can reduce the mutations in hepatoma cancer cells and iPSCs-derivatives
Source: PubMed Central journal article supplement (PMC6570841; doi:10.1186/s12885-019-5786-y), 2019-06-15
Supplement: 12885_2019_5786_MOESM1_ESM.pdf [file 12885_2019_5786_MOESM1_ESM.pdf]

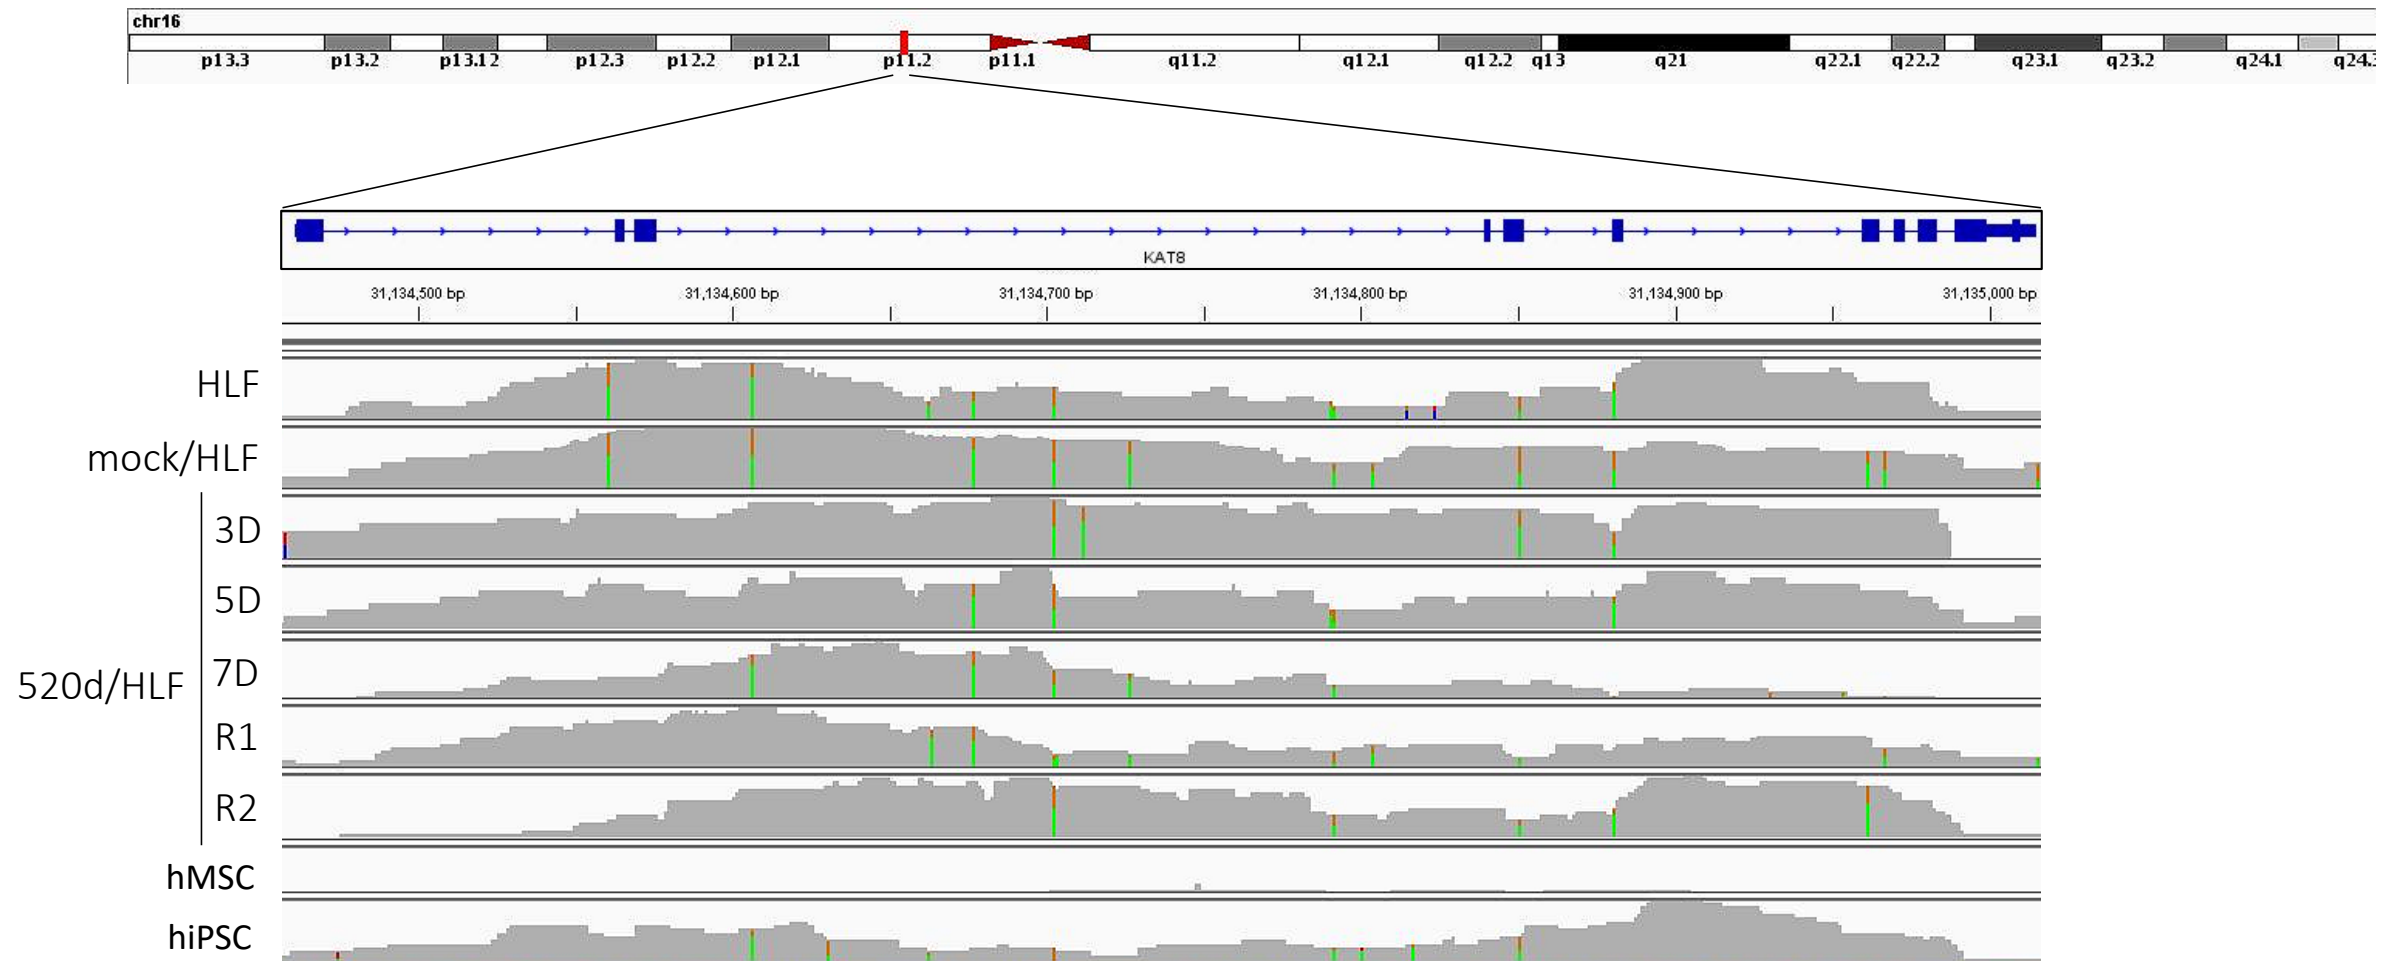

a. P21: reduction derived from 520d-5p transfection

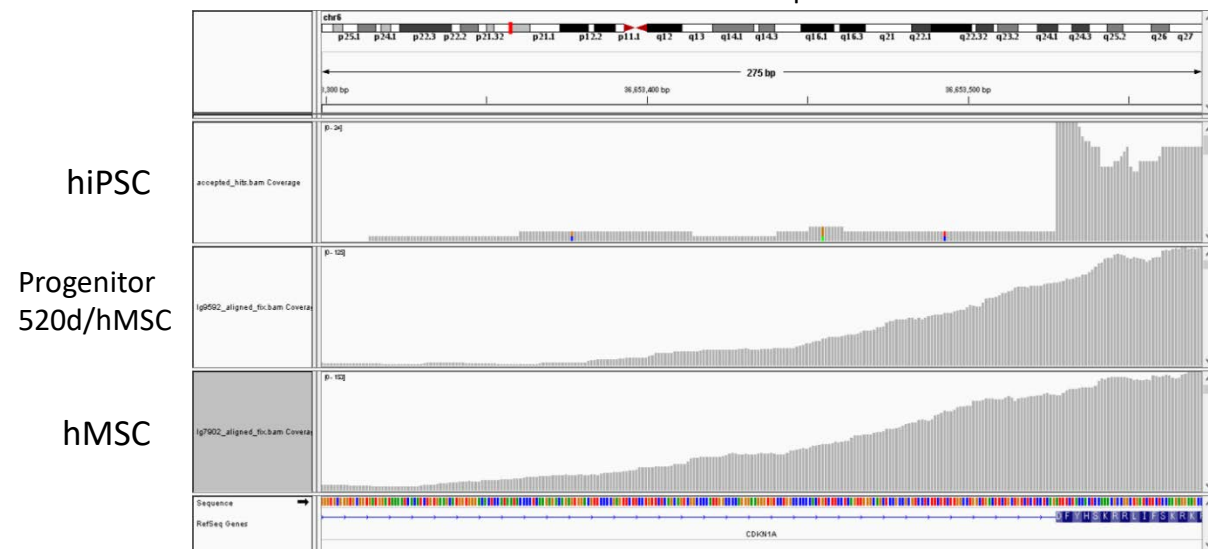

b. TP53 : alterations accompanied with the differentiation

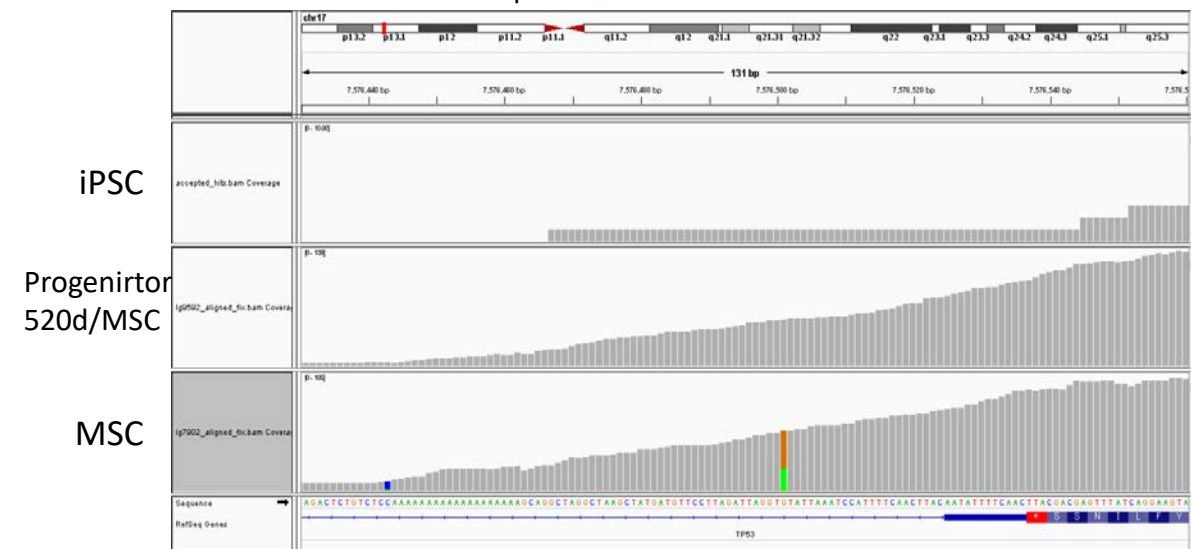

c. TP53: disappearance derived from 520d-5p transfection

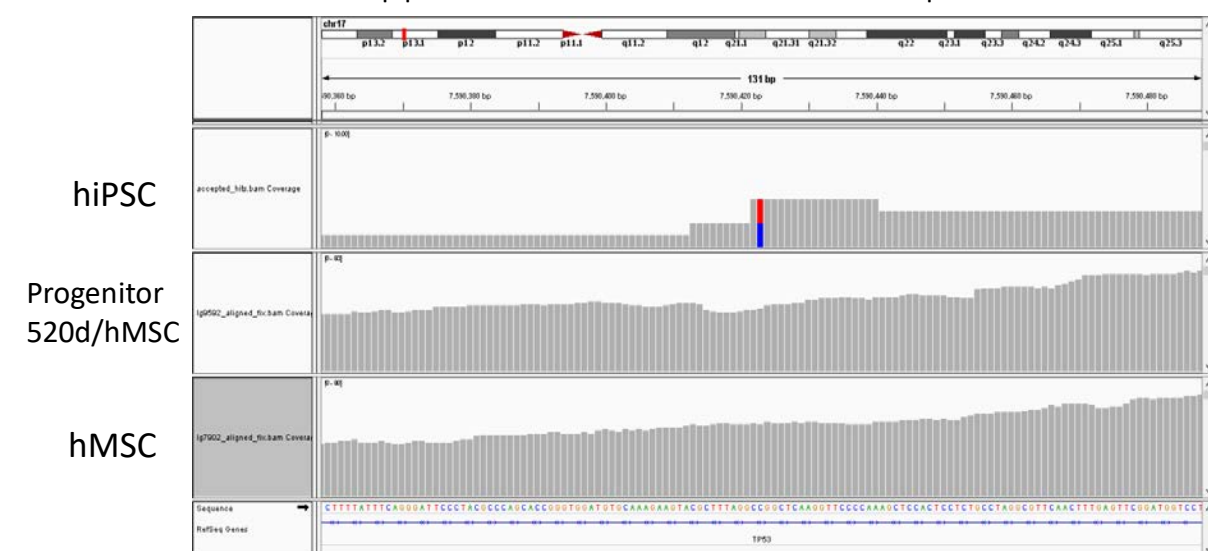

d. BRAF : reduction derived from 520d-5p transfection

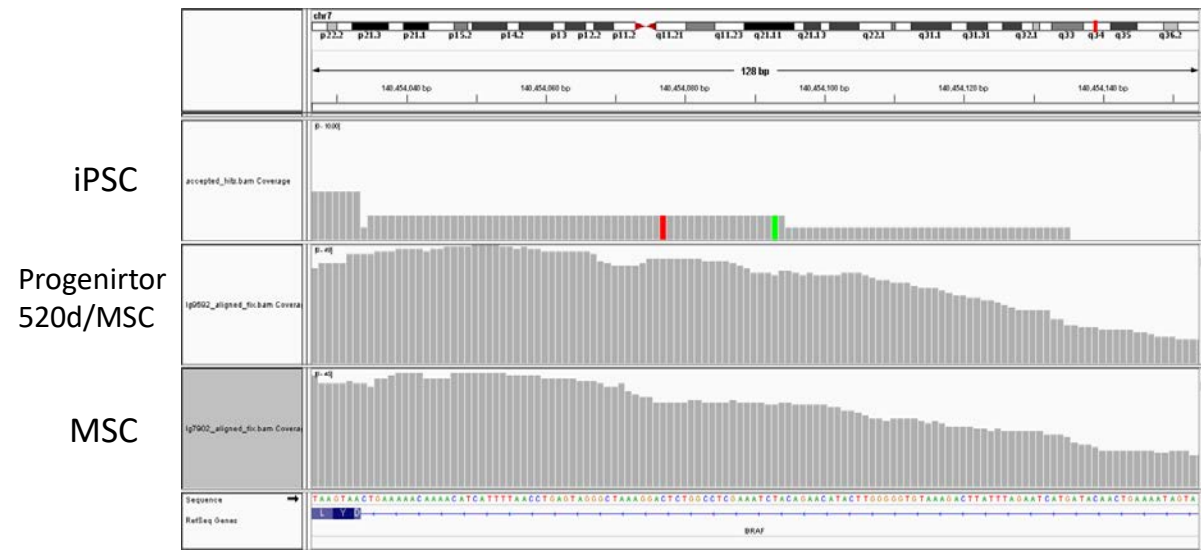

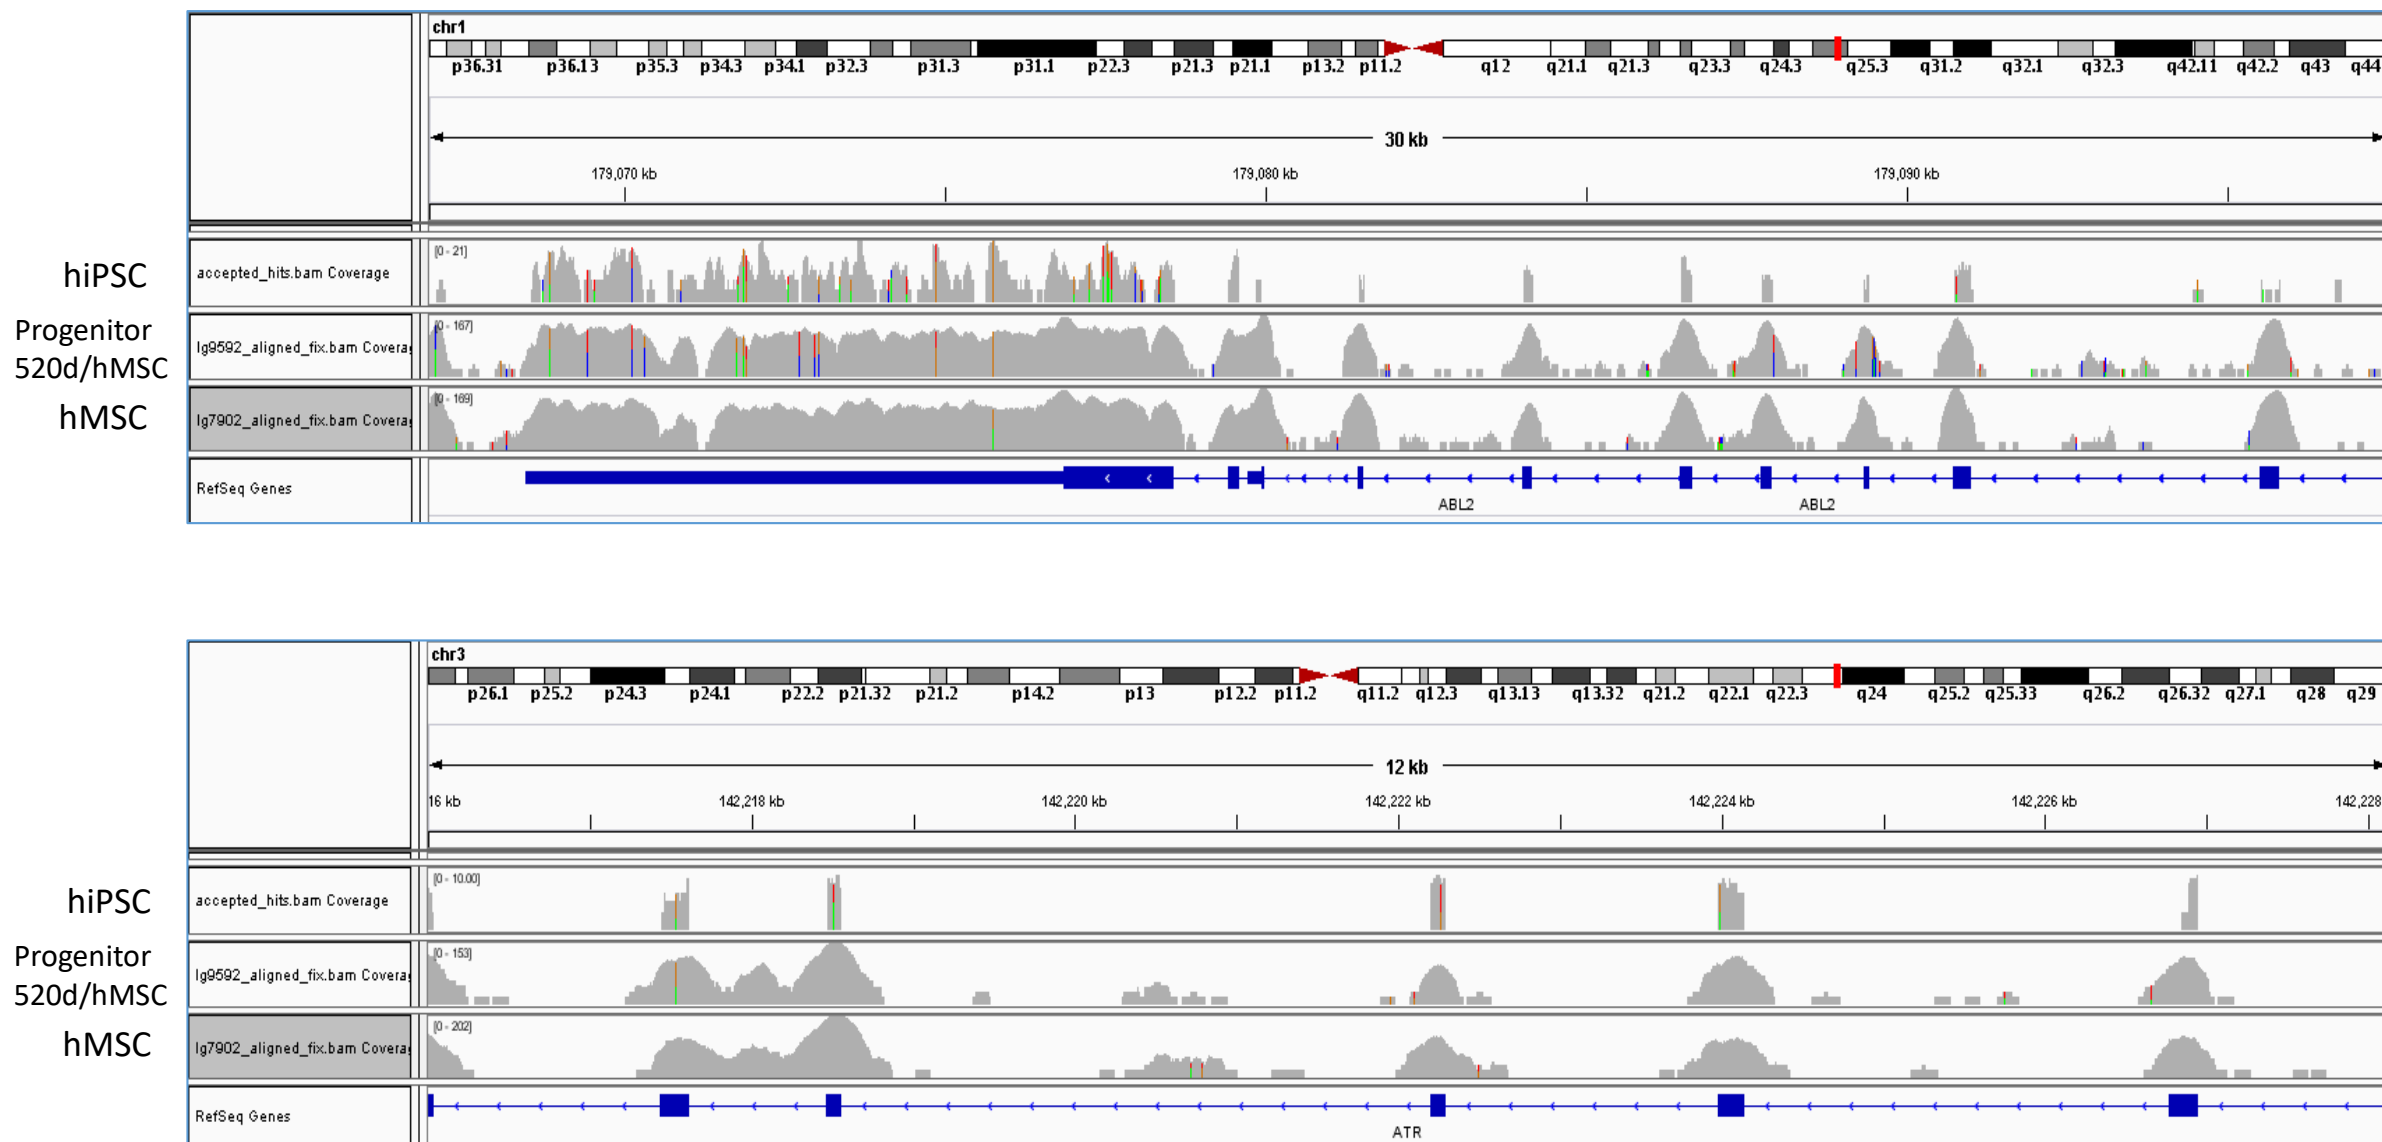

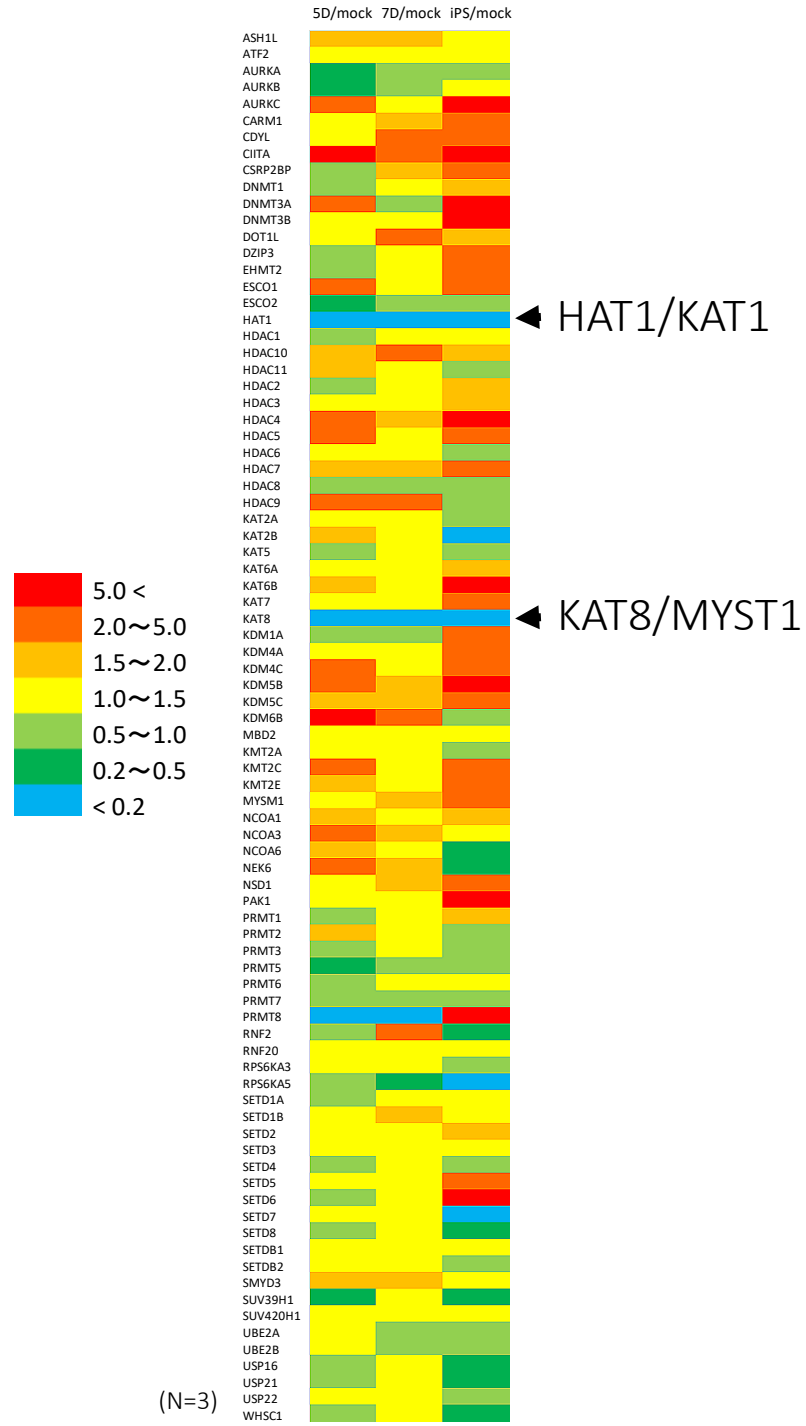

(N=3)
